# Supplementary material
Source: PubMed Central journal article supplement (PMC4162882)
Supplement: JZUSB15-0809ESM.pdf [file JZUSB15-0809ESM.pdf]

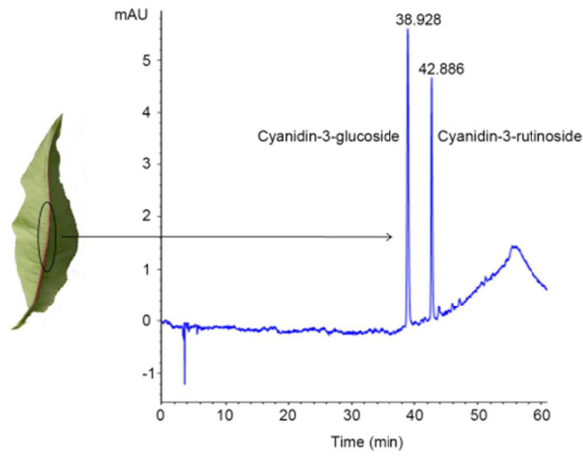

**Fig. S1 HPLC chromatogram of the anthocyanin components in the leaf midrib of 'Heiyoutao'**

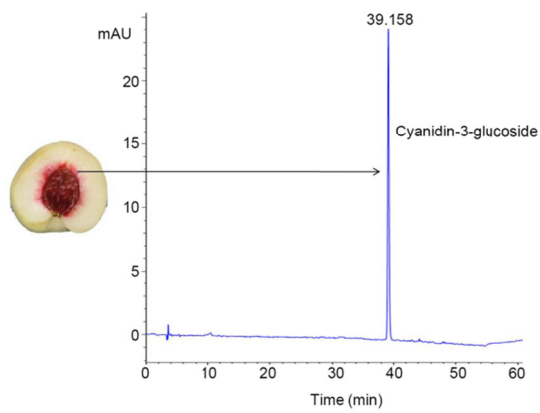

**Fig. S2 HPLC chromatogram of the cultivar 'Xuebaitao' from the flesh surrounding the stone at maturity**

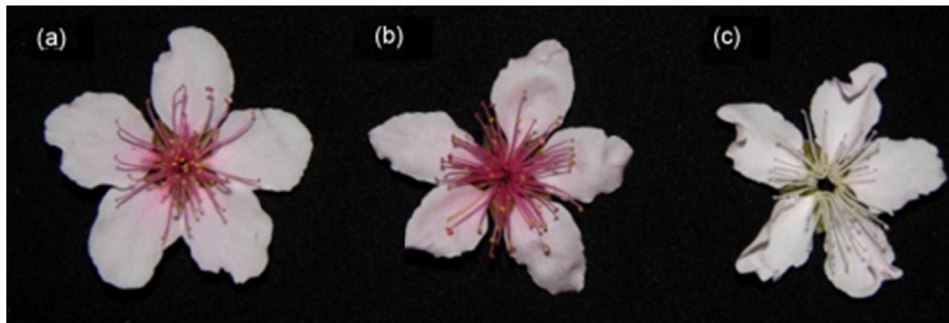

**Fig. S3 Petals during full bloom of 'Beijingyixianhong' (a), 'Heiyoutao' (b), and 'Xuebaitao' (c)**
